# Supplementary material
Source: publisher figshare collection journal article supplement (https://acs.figshare.com/ndownloader/files/17513105)
Supplement: Supplementary file 1 [file 17513105]

Supporting Information for

**A multicolor aptasensor based on DNA-induced Au-Ag nanorods for  
simultaneous and visual detection of inorganic and organic mercury**

Zhiqiang Chen<sup>†</sup>, Peipei Li<sup>†</sup>, Xian Cheng<sup>†</sup>, Weijuan Yang<sup>‡\*</sup>, Yongning Wu<sup>§</sup>, Qingai  
Chen<sup>¶</sup>, FengFu Fu<sup>†\*</sup>

<sup>†</sup>Key Laboratory for Analytical Science of Food Safety and Biology of MOE, Fujian  
Provincial Key Lab of Analysis and Detection for Food Safety, College of Chemistry,  
Fuzhou University, Fuzhou, Fujian 350116, China.

<sup>‡</sup>State Key Laboratory of Ecological Pest Control for Fujian and Taiwan Crops,  
College of Plant Protection, Fujian Agriculture and Forestry University, Fuzhou  
350002, China

<sup>§</sup>China National Center for Food Safety Risk Assessment, Beijing 100022, China

<sup>¶</sup>Department of tourism and hotel management, Fujian Business University, Fuzhou  
350012, P.R. China

---

\* Corresponding author. Tel./Fax: +86-591-22866135; E-mail address: [fengfu@fzu.edu.cn](mailto:fengfu@fzu.edu.cn) (F.-F. Fu);  
[kuihuadexiao@163.com](mailto:kuihuadexiao@163.com) (W.-J. Yang)

## 1. Reagents and apparatus used in the experiment

All DNA aptamers used in the experiment were synthesized by Sangon Biological Technology & Services Co., Ltd. (Shanghai, China), and their detailed sequences were shown in Table S1. The DNA concentrations were accurately quantified by the optical density at the wavelength of 260 nm ( $OD_{260}$ ), which based on their individual absorption coefficients.  $AgNO_3$  (99.99%), trisodium citrate ( $C_6H_5O_7Na_3 \cdot 2H_2O$ ), cetyl-trimethyl ammonium bromide (CTAB) ( $\geq 99\%$ ) and Tris-(hydroxymethyl)-aminomethane (Tris) were provided by Sigma-Aldrich company (China). Methyl-mercuric chloride ( $CH_3HgCl$ ) and ethylmercuric chloride ( $C_2H_5HgCl$ ) standards were purchased from Dr. Ehrenstorfer GmbH (Germany).  $Hg^{2+}$  standard (1 mg/mL Hg in 2~5%  $HNO_3$ ) and  $HAuCl_4 \cdot 3H_2O$  (49% Au) were received from J&K Scientific company (China).  $NaBH_4$  ( $\geq 98\%$ , AR) and Ascorbic acid (AA) ( $\geq 99.7\%$ , AR) were obtained from Sinopharm Chemical Reagent Co., Ltd. (China). The UV-visible absorption spectra were obtained with Tecan's Infinite M200 PRO (Switzerland) multifunctional microplate reader. Transmission electron microscope (TEM) images were characterized by Tecnai G2 F20 U-TWIN transmission electron microscope (FEI, USA).

**Table S1:** All DNA sequences we used in the experiment

| DNA name        | DNA sequence                           |
|-----------------|----------------------------------------|
| H <sub>R</sub>  | 5'-HS-CTGCTGCTGCAAAAAGCAGCAGCAG-3'     |
| H <sub>T5</sub> | 5'-HS-CTTTGTTAAAAATTCTTTG-3'           |
| H <sub>T7</sub> | 5'-HS-GTTCTTTGTTAAAAATTCTTTGTTC-3'     |
| H <sub>T9</sub> | 5'-HS-TTGTTCTTTGTTAAAAATTCTTTGTTCTT-3' |

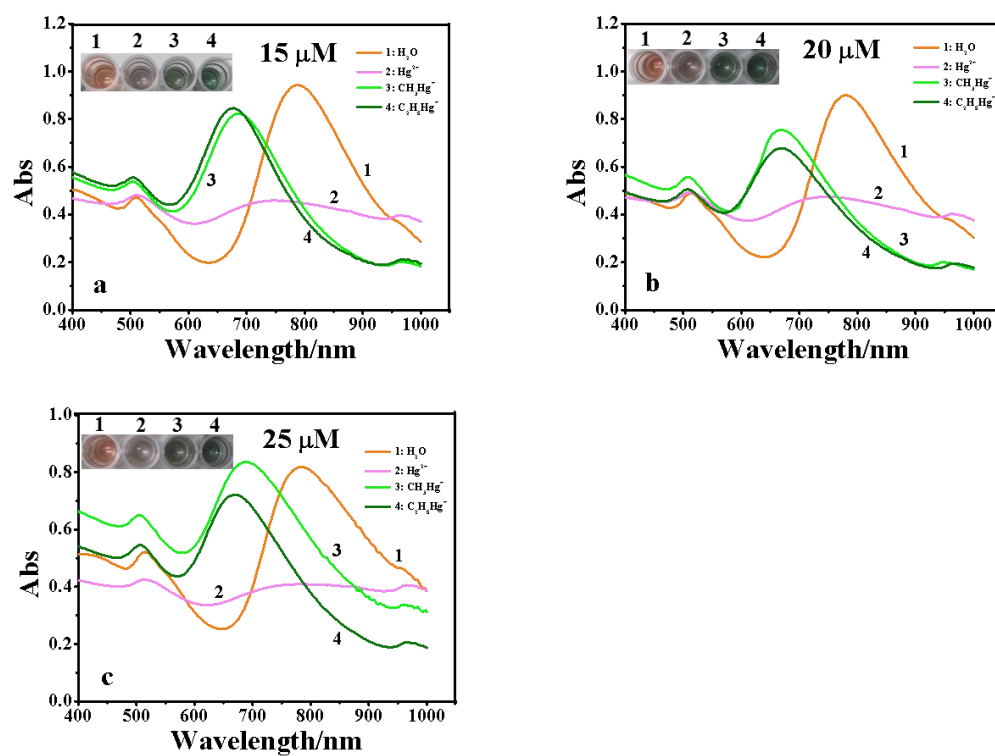

**Figure S1:** Optimization of the  $H_{T7}$  DNA concentration for specifically detecting mercury species. (a): 15  $\mu\text{M}$ ; (b): 20  $\mu\text{M}$ ; (c): 25  $\mu\text{M}$ . The photograph is (1) Blank; (2)  $\text{Hg}^{2+}$ ; (3)  $\text{CH}_3\text{Hg}^+$ ; (4)  $\text{C}_2\text{H}_5\text{Hg}^+$ .

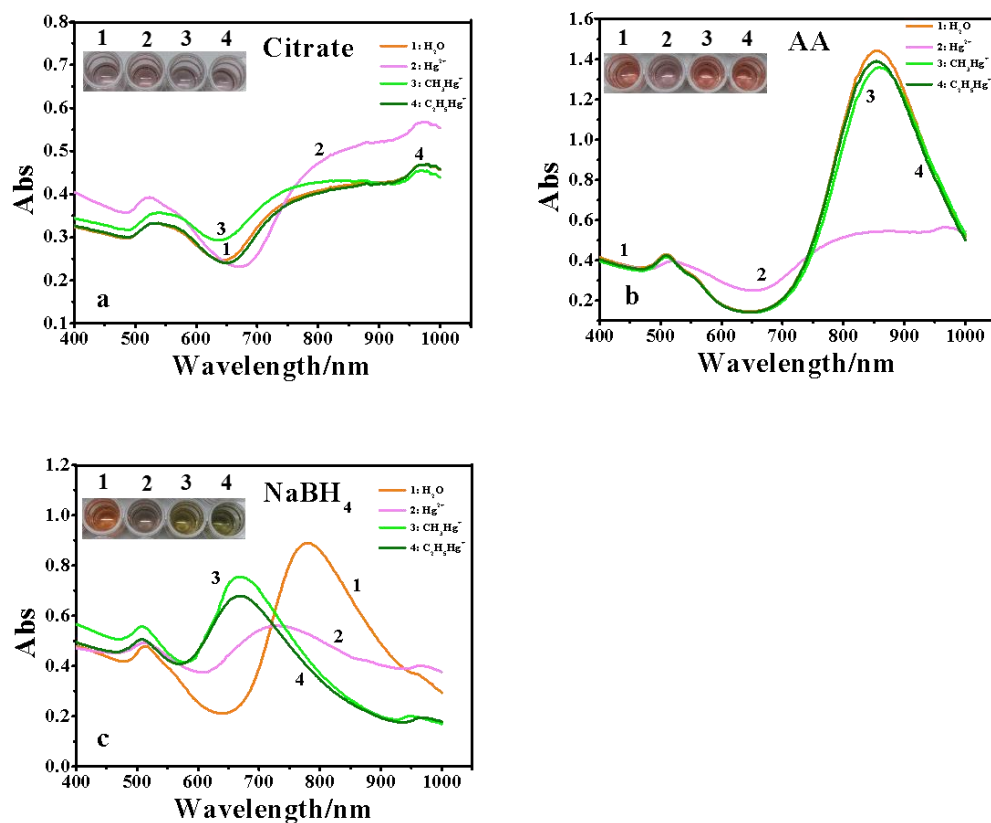

**Figure S2:** The effect of reducing agent on the specifically detection of mercury species. Data was obtained under the optimal conditions except reducing agent. (a): Citrate; (b): AA; (c): NaBH<sub>4</sub>. The photograph is (1) Blank; (2) Hg<sup>2+</sup>; (3) CH<sub>3</sub>Hg<sup>+</sup>; (4) C<sub>2</sub>H<sub>5</sub>Hg<sup>+</sup>.

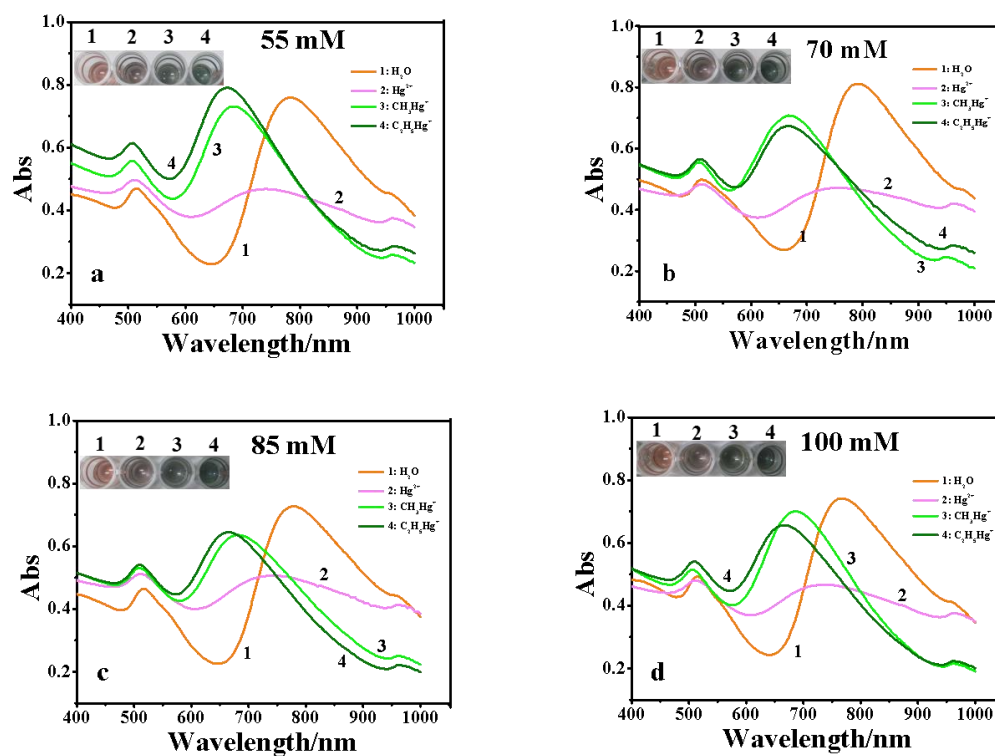

**Figure S3:** Optimization of the  $\text{NaBH}_4$  concentration for specifically detecting mercury species. Data was obtained under the optimal conditions except  $\text{NaBH}_4$  concentration. (a): 55 mM; (b): 70 mM; (c): 85 mM; (d) 100 mM. The photograph is (1) Blank; (2)  $\text{Hg}^{2+}$ ; (3)  $\text{CH}_3\text{Hg}^+$ ; (4)  $\text{C}_2\text{H}_5\text{Hg}^+$ .

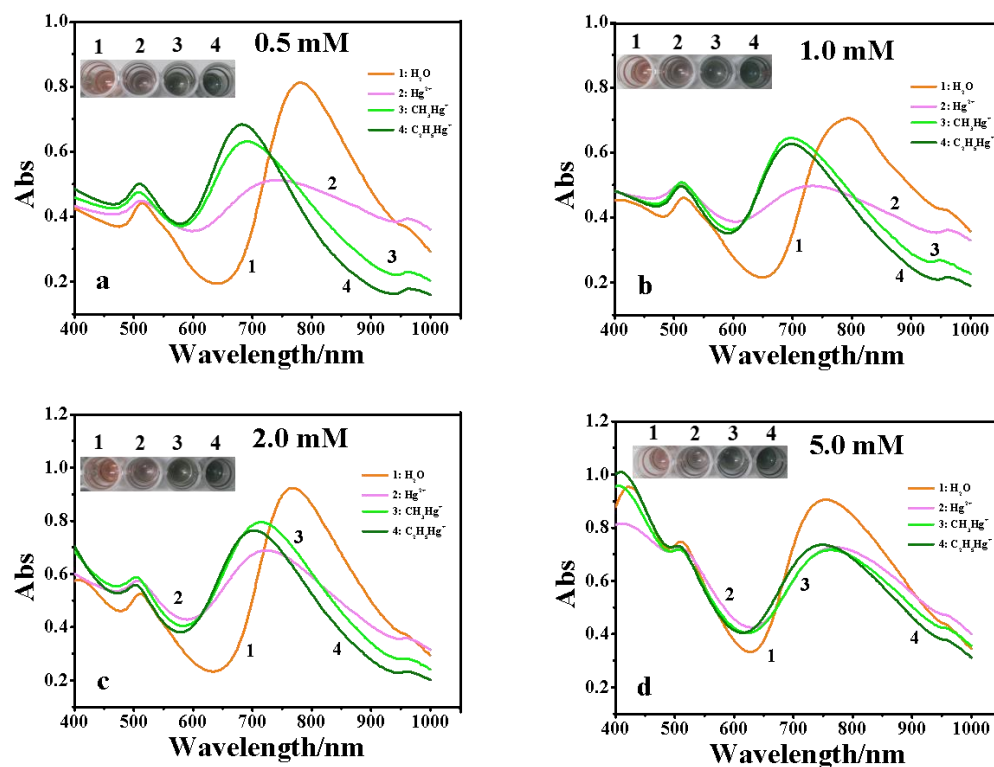

**Figure S4:** Optimization of the  $\text{Ag}^+$  concentration for specifically detecting mercury species. Data was obtained under the optimal conditions except  $\text{Ag}^+$  concentration. (a): 0.5 mM; (b): 1.0 mM; (c): 2.0 mM; (d) 5.0 mM. The photograph is (1) Blank; (2)  $\text{Hg}^{2+}$ ; (3)  $\text{CH}_3\text{Hg}^+$ ; (4)  $\text{C}_2\text{H}_5\text{Hg}^+$ .

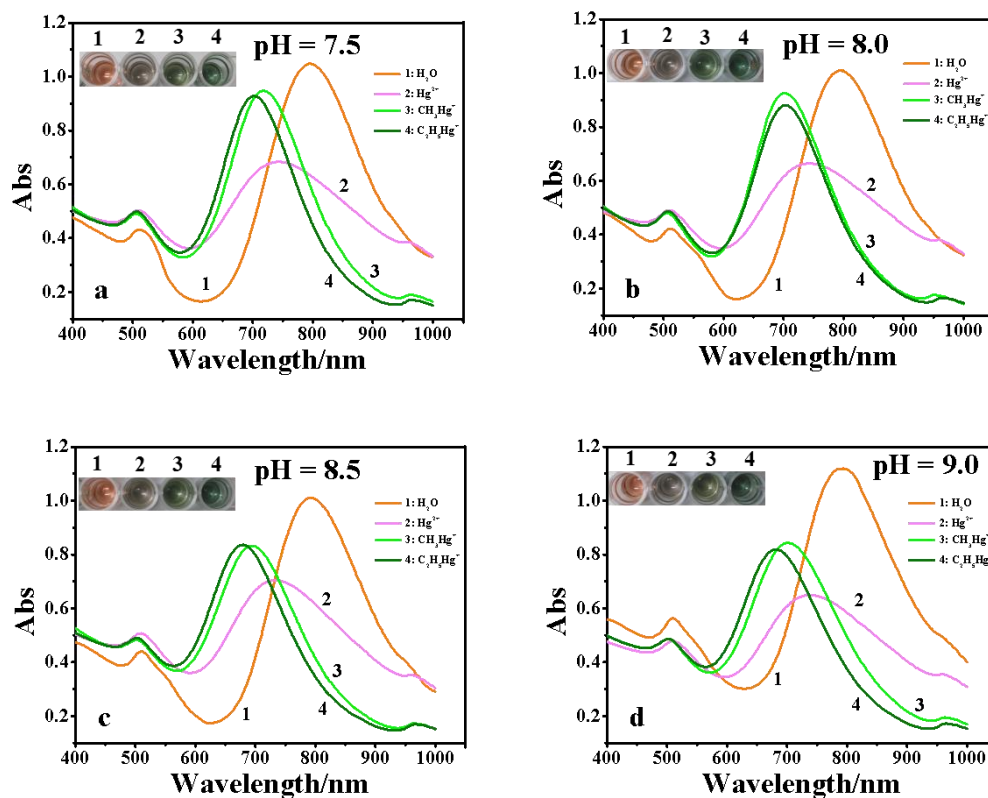

**Figure S5:** Optimization of the pH value of Tris-HNO<sub>3</sub> buffer solution for specifically detecting mercury species. Data was obtained under the optimal conditions except pH of Tris-HNO<sub>3</sub>. (a): pH 7.5; (b): pH 8.0; (c): pH 8.5; (d) pH 9.0. The photograph is (1) Blank; (2) Hg<sup>2+</sup>; (3) CH<sub>3</sub>Hg<sup>+</sup>; (4) C<sub>2</sub>H<sub>5</sub>Hg<sup>+</sup>.



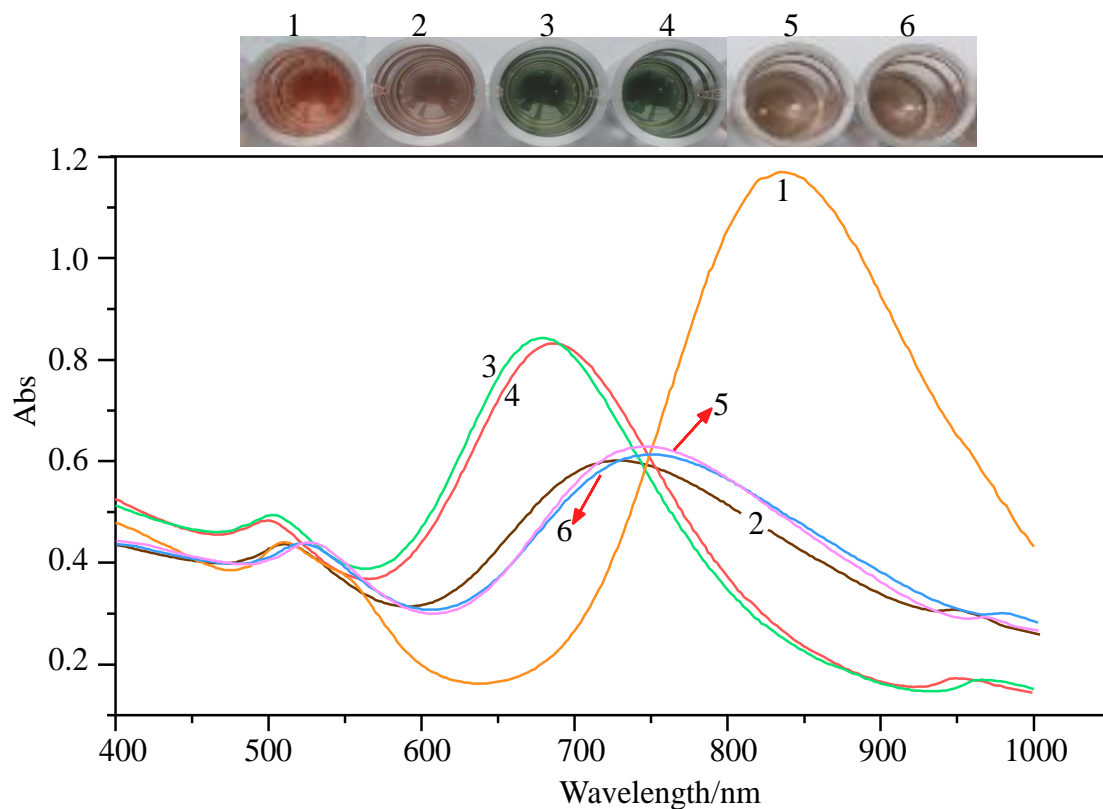

**Figure S6:** Photographs and absorption spectra for detecting different mercury species under optimal conditions. (1): black; (2): 40 ppm  $\text{Hg}^{2+}$  and 40 ppm  $\text{CH}_3\text{Hg}^+$ ; (3): 40 ppm  $\text{Hg}^{2+}$ , 40 ppm  $\text{CH}_3\text{Hg}^+$  and 50 mM AA; (4): 40 ppm  $\text{Hg}^{2+}$ , 40 ppm  $\text{C}_2\text{H}_5\text{Hg}^+$  and 50 mM AA; (5): 12 ppm  $\text{Hg}^{2+}$ ; (6) 12 ppm  $\text{Hg}^{2+}$ , 20 ppm  $\text{CH}_3\text{Hg}^+$  and 20 ppm  $\text{C}_2\text{H}_5\text{Hg}^+$ .
